# Supplementary material for: Fiber-modified hexon-chimeric oncolytic adenovirus targeting cancer associated fibroblasts inhibits tumor growth in gastric carcinoma
Source: PubMed Central journal article supplement (PMC5652720; doi:10.18632/oncotarget.20273), 2017-08-16
Supplement: oncotarget-08-76468-s001.pdf [file oncotarget-08-76468-s001.pdf]

# Fiber-modified hexon-chimeric oncolytic adenovirus targeting cancer associated fibroblasts inhibits tumor growth in gastric carcinoma

## SUPPLEMENTARY MATERIALS

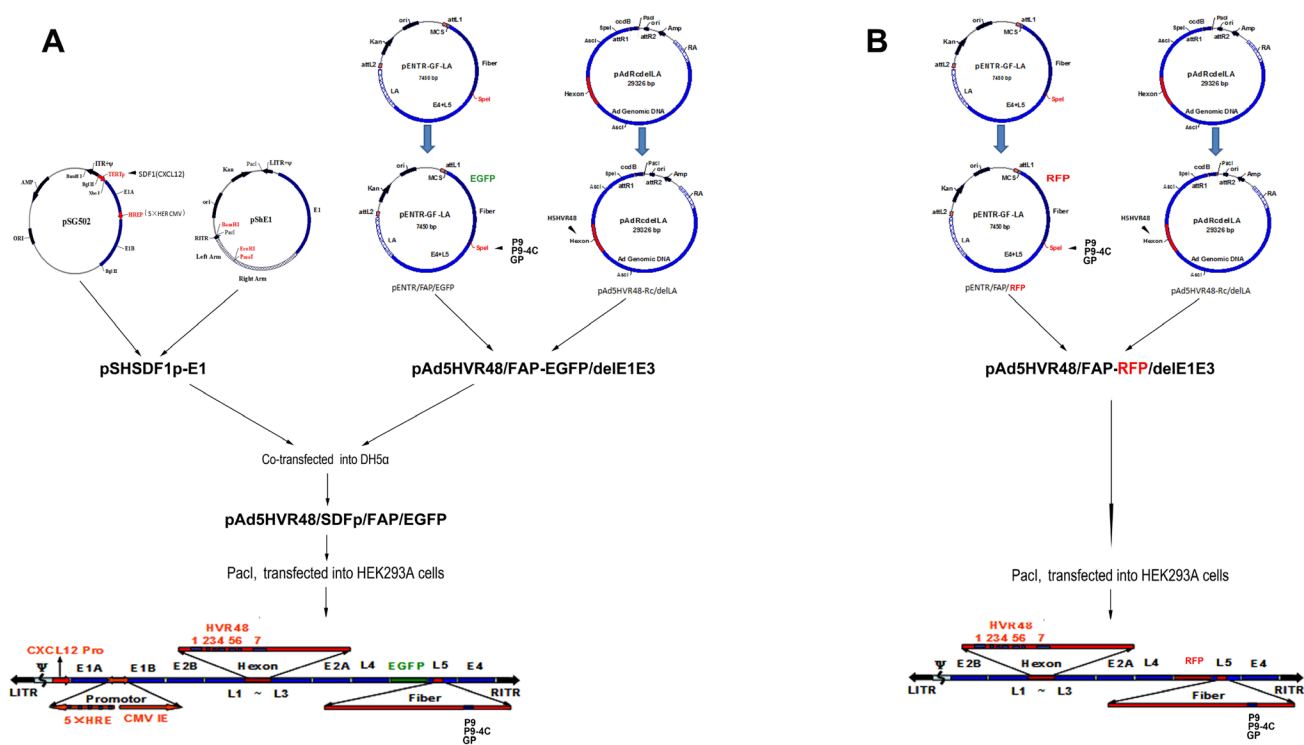

**Supplementary Figure 1:** Illustration for the reconstruction process of the four hexon-chimeric oncolytic adenovirus (P9, P9-4C, GP and Ad) adenoviruses (A) and their corresponding replication-defective adenovirus (B).
